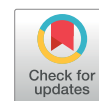

## Issues and Events

### UPDATES TO THE STANDARDS OF MEDICAL CARE IN DIABETES—2021

The American Diabetes Association issued important updates to the 2021 Standards of Medical Care in Diabetes (Standards of Care). Changes include new data on teplizumab and SGLT2 inhibitors as well as medications' effects on patients with chronic kidney disease. Updated sections include Classification and Diagnosis of Diabetes, Cardiovascular Disease and Risk Management, and Microvascular Complications and Foot Care. Access the Standards of Care as well as all updates at [care.diabetesjournals.org/content/44/Supplement\\_1](http://care.diabetesjournals.org/content/44/Supplement_1).

### IDF VIRTUAL CONGRESS 2021

The International Diabetes Federation (IDF) Congress 2021 will be held virtually on 6–11 December 2021. The program includes updates on the latest research and tools to manage and prevent diabetes complications and is organized across four streams—Cardiovascular Disease and Hypertension, Eye and Kidney, Foot and Neuropathy, and COVID-19 and Diabetes. Registration and abstract submission are open. For further information, visit <https://idf2021.org>.

### OVERCOMING THERAPEUTIC INERTIA CERTIFICATE PROGRAM

ADA offers self-paced online continuing education (CE) programs to help you optimize care for people with diabetes. The Overcoming Therapeutic Inertia (OTI) Certificate Program is now available and offers up to 11.5 CE credits. To register for the program, please visit [professional.diabetes.org/content-page/overcoming-therapeutic-inertia-certificate-oti-program](http://professional.diabetes.org/content-page/overcoming-therapeutic-inertia-certificate-oti-program).

### DIABETES IS PRIMARY CERTIFICATE BUNDLE

Receive up to 10 continuing education credits or American Board of Internal Medicine MOC (Maintenance of Certification) credits in this self-paced online program for primary care providers. In addition to nine topic-based modules, participants receive access to exclusive “Ask the Expert” live events, an online learning collaborative for sharing best practices and networking with colleagues, and a 1-year American Diabetes Association professional membership. For more information, please visit [professional.diabetes.org/content-page/upcoming-programs](http://professional.diabetes.org/content-page/upcoming-programs).

### COMPENDIUM: CHRONIC KIDNEY DISEASE AND TYPE 2 DIABETES

ADA's most recently published clinical compendium discusses diabetic kidney disease, mechanisms underlying progression to diabetic vascular disease, and opportunities to improve clinical outcomes. This monograph is supported by unrestricted education grants from AstraZeneca and Bayer. To access this and other clinical compendia for free, visit [professional.diabetes.org/monographs](http://professional.diabetes.org/monographs).

### “DIABETES AND COVID-19” SPECIAL ARTICLE COLLECTIONS

These online collections of articles feature the latest studies, clinical observations, and commentary published in *Diabetes Care* and *Diabetes* on COVID-19 and diabetes. Topics include management of diabetes and its complications during the pandemic, blood glucose control and remote glucose monitoring, and outcomes in patients with hyperglycemia, cardiovascular risk, and obesity. The special article collections are updated regularly as relevant articles are published online. To access the *Diabetes Care* collection, visit [care.diabetesjournals.org/collection/diabetes-and-COVID19](http://care.diabetesjournals.org/collection/diabetes-and-COVID19). For the *Diabetes* collection, visit [diabetes.diabetesjournals.org/collection/diabetes-and-COVID19-articles](http://diabetes.diabetesjournals.org/collection/diabetes-and-COVID19-articles).

### SPECIAL ARTICLE COLLECTION: WOMEN IN DIABETES LEADERSHIP

This new online collection of articles includes original research and commentary examining the underrepresentation of women in scientific leadership positions both historically and in the present day. Access the collection at [care.diabetesjournals.org/collection/women-in-diabetes-leadership](http://care.diabetesjournals.org/collection/women-in-diabetes-leadership).

### DIABETES CORE UPDATE PODCASTS

*Diabetes Core Update* is a monthly audio podcast devoted to presenting and discussing the latest clinically relevant articles from the American Diabetes Association's scholarly journals. *Diabetes Core Update* audio podcasts are free and can be accessed through iTunes or RSS feed. For more information, please visit [diabetesjournals.org/content/diabetes-core-update-podcasts](http://diabetesjournals.org/content/diabetes-core-update-podcasts).

**Diabetes Care** (print ISSN 0149-5992, online ISSN 1935-5548) is owned, controlled, and published monthly by the American Diabetes Association, Inc., 2451 Crystal Drive, Suite 900, Arlington, VA 22202. *Diabetes Care* is a registered trademark of the American Diabetes Association. **Periodicals postage** paid at Arlington, VA, and additional mailing offices. **POSTMASTER:** Send all UAA to CFS (see DMM 507.1.5.2). **NON-POSTAL AND MILITARY FACILITIES:** Send address corrections to American Diabetes Association, Membership & Publication Operations, PO Box 37433, Boone, IA 50037-0433. Claims for missing issues should be made within 6 months of publication. The publisher expects to supply missing issues free of charge only when losses have been sustained in transit and when the reserve stock permits.
